# Supplementary material
Source: Royal Society of Chemistry journal article supplement (doi:10.1039/d6qi00591h)

(a)

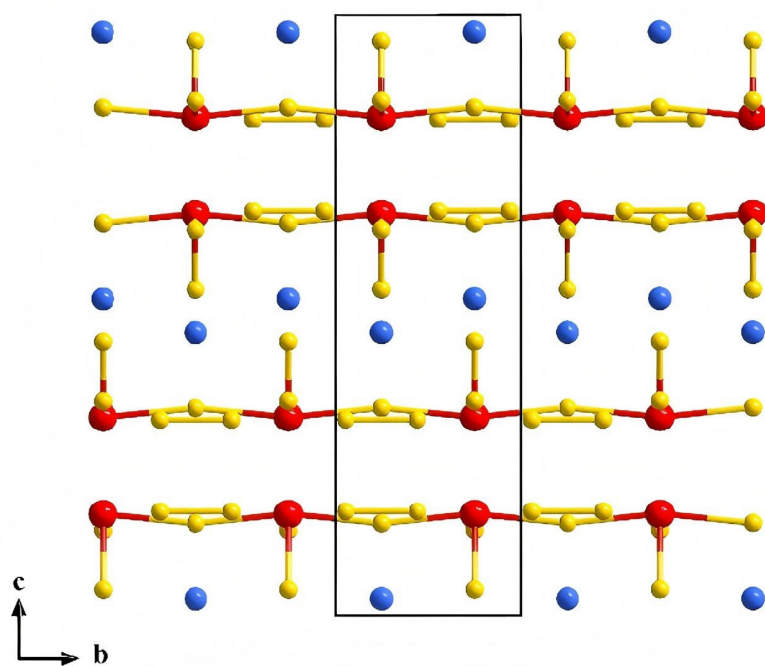

**Br : S = 1:5**

(b)

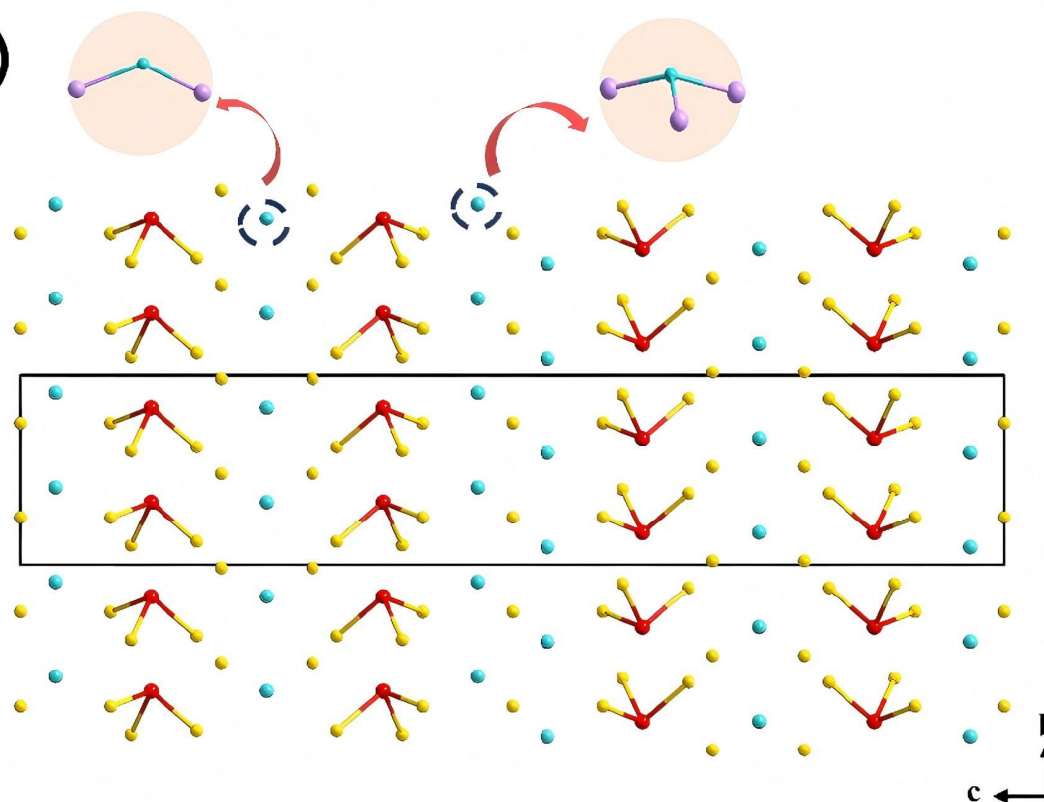

**Cl : S = 1:3**

(c)

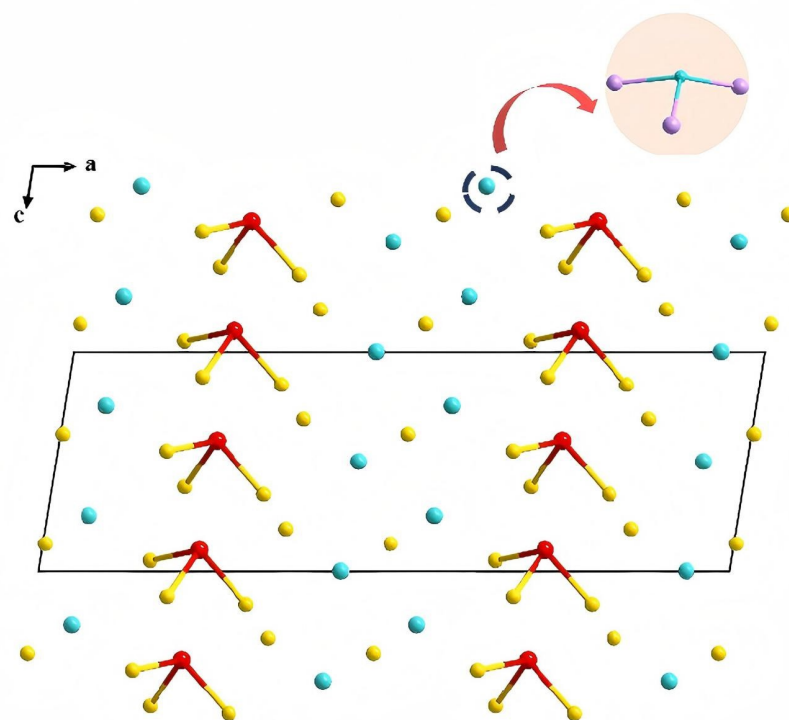

**Cl : S = 1:2.5**

(d)

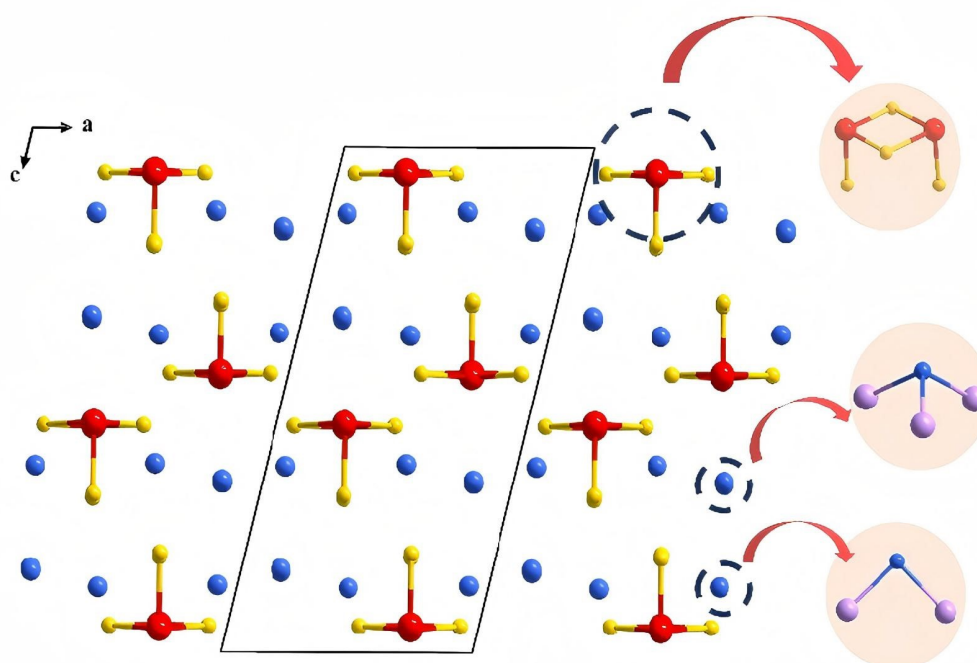

**Br : S = 1:1**

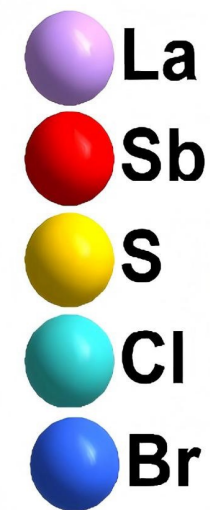

Supplement: d6qi00591h1.pdf [file d6qi00591h1.pdf]

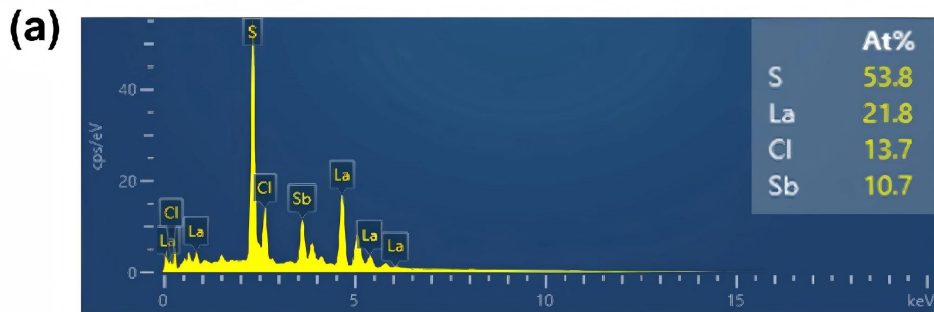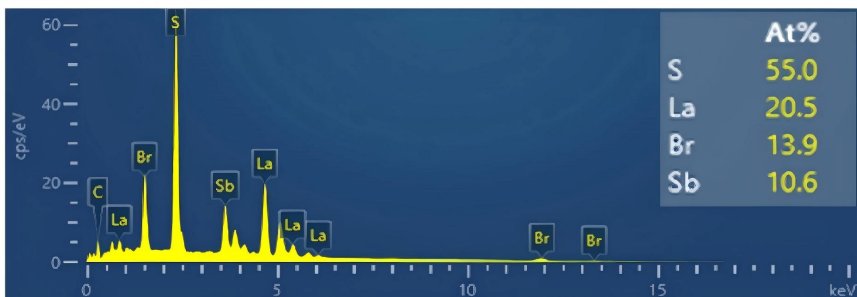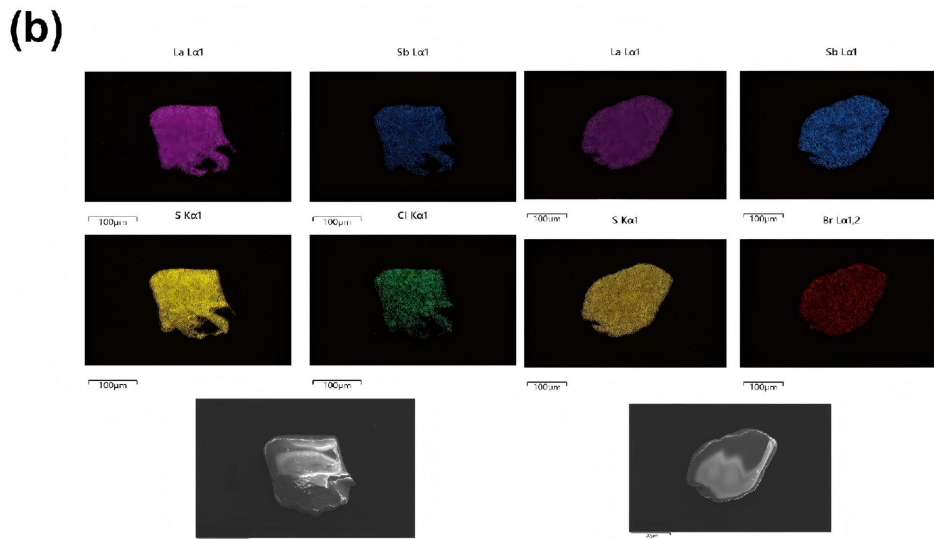

Supplement: d6qi00591h2.pdf [file d6qi00591h2.pdf]

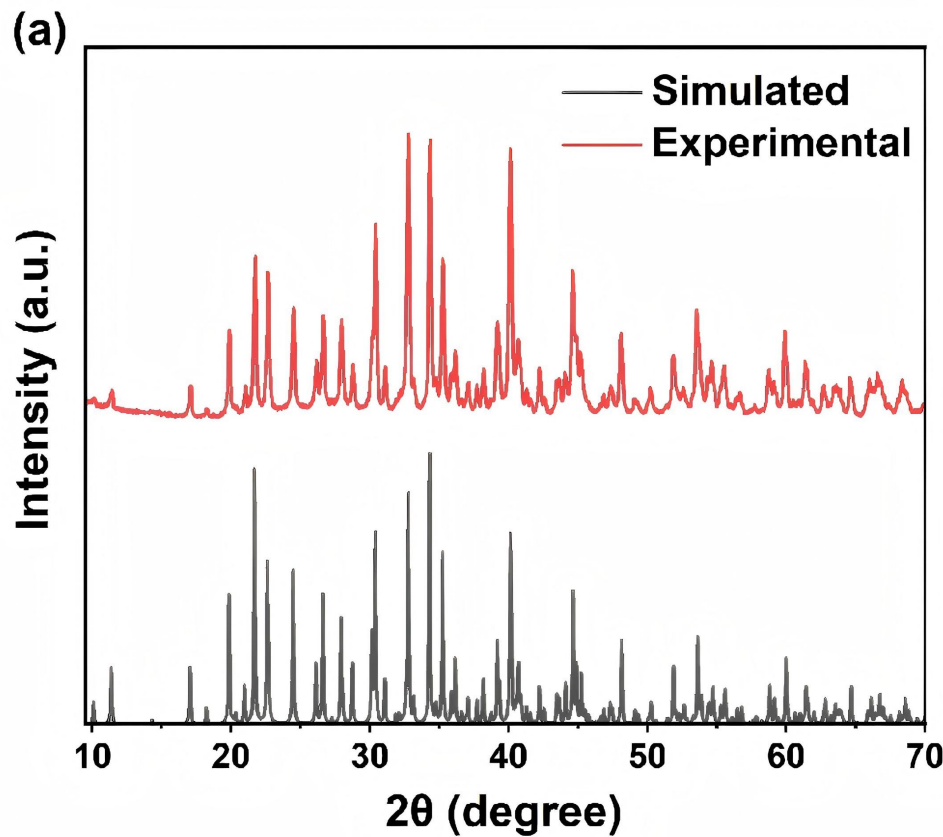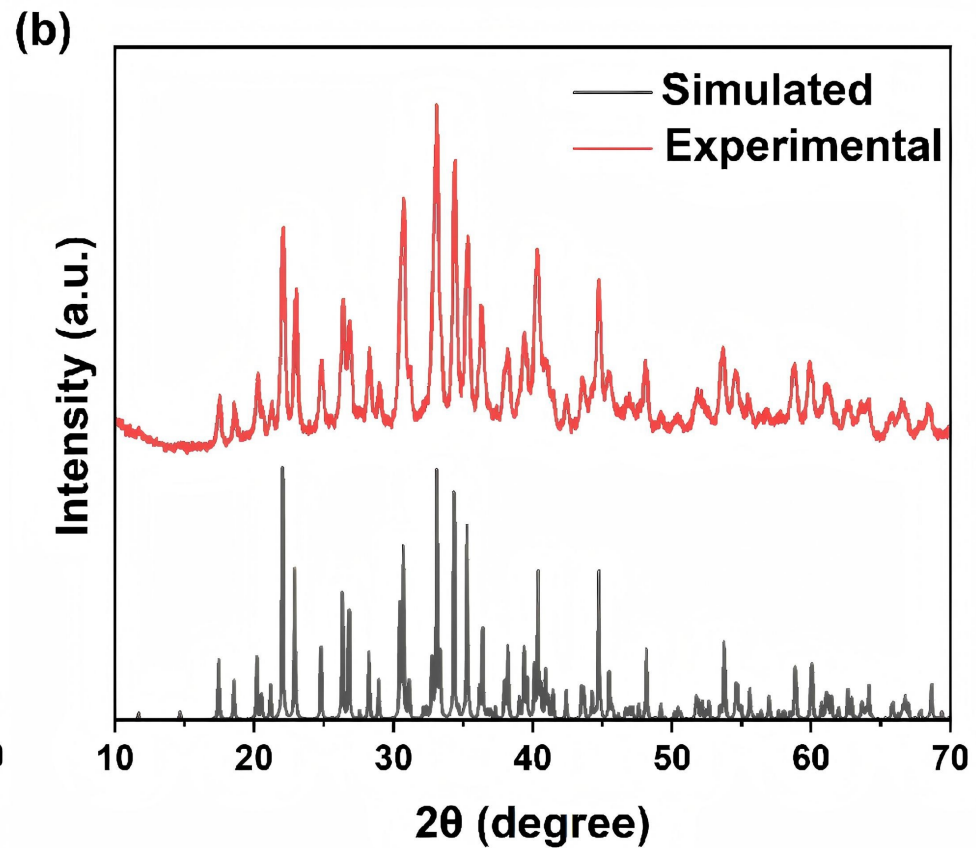

Supplement: d6qi00591h3.pdf [file d6qi00591h3.pdf]

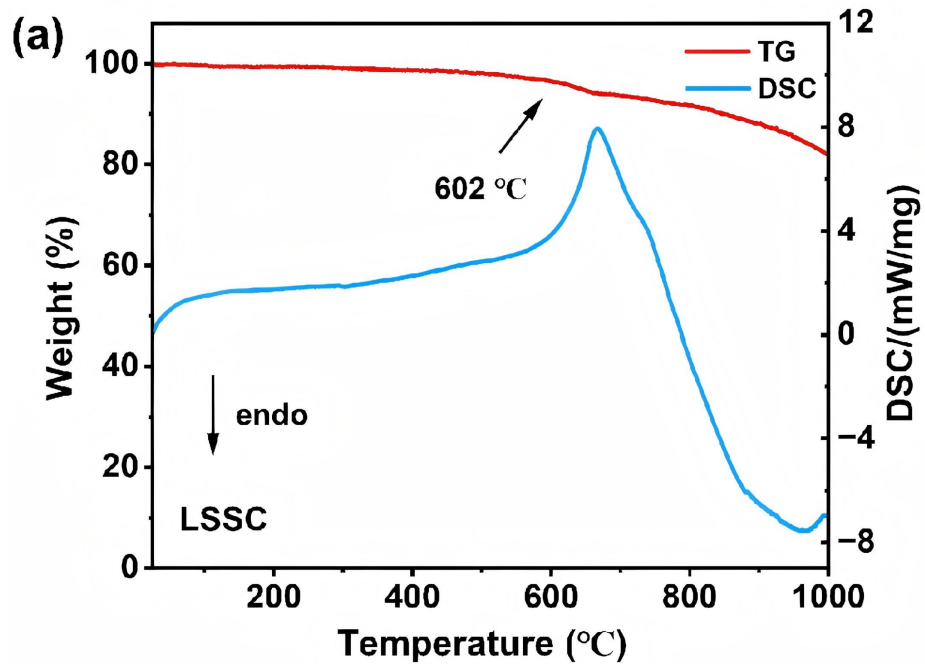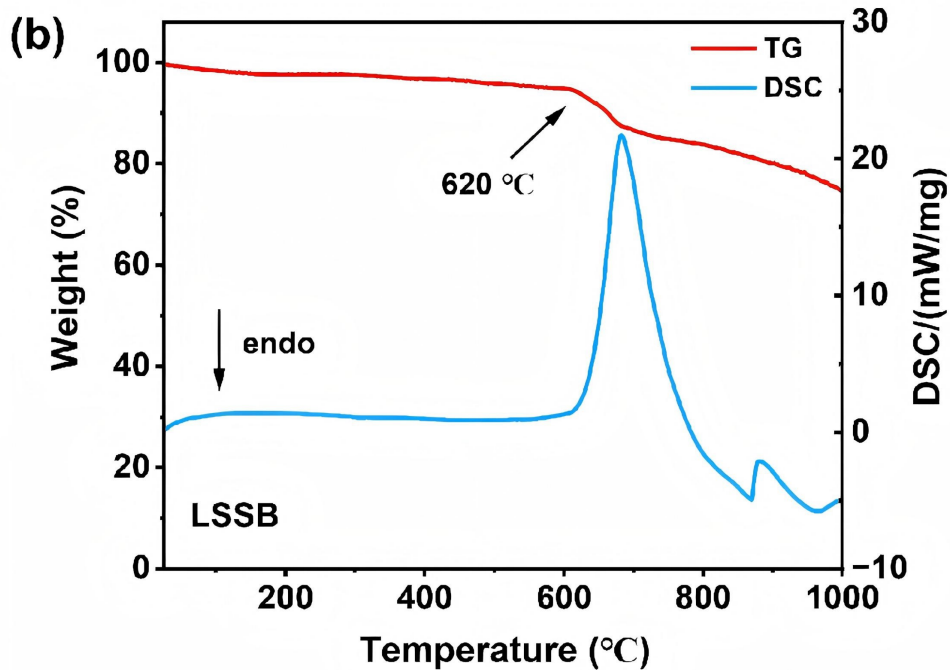

Supplement: d6qi00591h4.pdf [file d6qi00591h4.pdf]

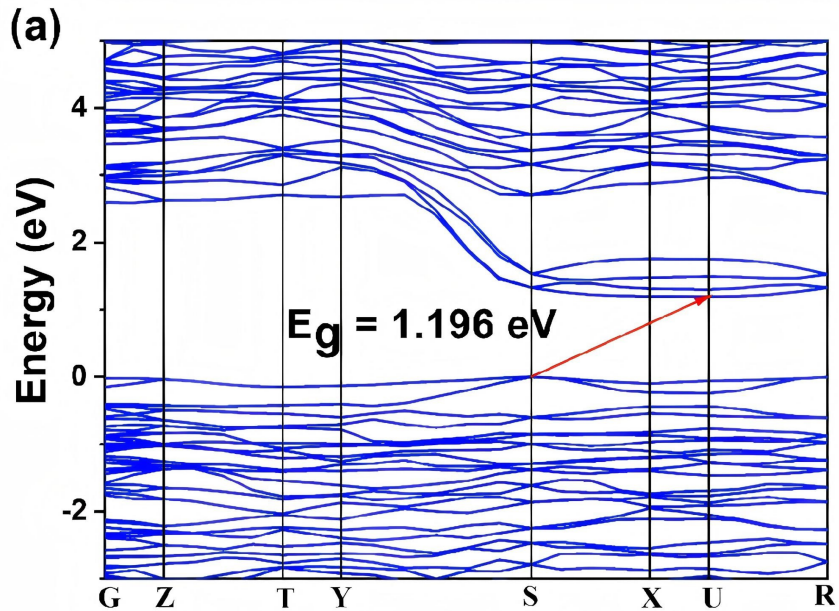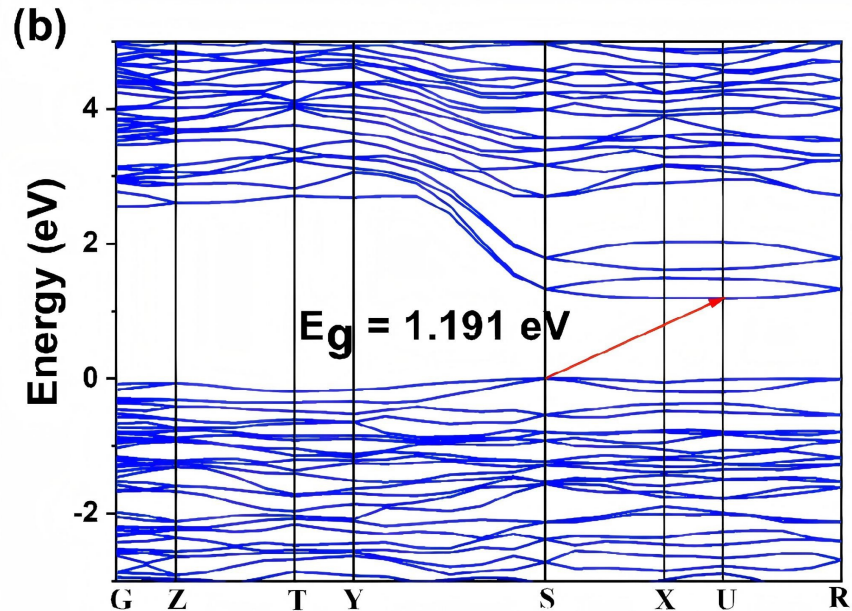

Supplement: d6qi00591h5.pdf [file d6qi00591h5.pdf]
